# Supplementary material for: Near-unity PLQY and high anti-thermal quenching red luminescence from one-dimensional hybrid manganese chloride for efficient and stable white light-emitting diodes
Source: Royal Society of Chemistry journal article supplement (doi:10.1039/d4tc01477d), 2024-01-01
Supplement: d4tc01477d1.pdf [file d4tc01477d1.pdf]

## Electronic supplementary information

# Near-Unity and High Anti-Thermal Quenching Red Luminescence from One-Dimensional Hybrid Manganese Chloride for Efficient and Stable White Light-Emitting Diodes

Binbin Su,<sup>\*a</sup> Maxim S. Molokeev,<sup>bcd</sup> Ran Chen,<sup>a</sup> Tao Zhang<sup>a</sup>

a. School of Materials Science and Engineering, Xi'an University of Science and Technology, Xi'an, 710054, Shaanxi, PR China.

b. Laboratory of Crystal Physics, Kirensky Institute of Physics, Federal Research Center KSC SB RAS, Krasnoyarsk 660036, Russia

c. Department of Engineering Physics and Radioelectronics, Siberian Federal University, Krasnoyarsk 660041, Russia

d. Research and Development Department, Kemerovo State University, Kemerovo, 650000, Russia

\*Corresponding Author

[BinBinSu@xust.edu.cn](mailto:BinBinSu@xust.edu.cn)

**Table S1.** The crystal structure parameters of (TMA)MnCl<sub>3</sub>

|                                               |                                                    |
|-----------------------------------------------|----------------------------------------------------|
| Chemical formula                              | C <sub>4</sub> H <sub>12</sub> Cl <sub>3</sub> MnN |
| Molecular weight                              | 235.44                                             |
| Temperature (K)                               | 293                                                |
| Space group, <i>Z</i>                         | <i>P6<sub>3</sub>/m, 2</i>                         |
| <i>a</i> (Å)                                  | 9.1504 (6)                                         |
| <i>c</i> (Å)                                  | 6.4984 (4)                                         |
| <i>V</i> (Å <sup>3</sup> )                    | 471.21 (7)                                         |
| $\rho_{\text{calc}}$ (g/cm <sup>3</sup> )     | 1.659                                              |
| $\mu$ (mm <sup>-1</sup> )                     | 2.176                                              |
| Reflections measured                          | 3710                                               |
| Reflections independent                       | 445                                                |
| Reflections with $F > 4\sigma(F)$             | 393                                                |
| $2\theta_{\text{max}}$ (°)                    | 58.44                                              |
| $R_{\text{int}}$                              | 0.0623                                             |
| Number of refinement parameters               | 21                                                 |
| $R_1 [F_o > 4\sigma(F_o)]^a$                  | 0.0446                                             |
| $wR_2^b$                                      | 0.1020                                             |
| <i>Goof</i>                                   | 1.130                                              |
| $\Delta\rho_{\text{max}}$ (e/Å <sup>3</sup> ) | 0.482                                              |
| $\Delta\rho_{\text{min}}$ (e/Å <sup>3</sup> ) | -0.687                                             |
| $(\Delta/\sigma)_{\text{max}}$                | <0.001                                             |
| Extinction coefficient (SHELXL 2014/7)        | 1.43 (9)                                           |

[a]  $R_1 = \sum \|F_o\| - \|F_c\| / \sum \|F_o\|$ , [b]  $wR_2 = [\sum w(F_o^2 - F_c^2)^2 / \sum w(F_o^2)^2]^{1/2}$ .

**Table S2.** The main bond lengths (Å) of (TMA)MnCl<sub>3</sub>

|        |            |       |            |
|--------|------------|-------|------------|
| Mn—Cl  | 2.5620 (7) | N—C16 | 1.438 (7)  |
| Mn—Cl1 | 2.5620 (7) | N—C17 | 1.438 (7)  |
| Mn—Cl2 | 2.5620 (7) | N—C18 | 1.438 (7)  |
| Mn—Cl3 | 2.5620 (7) | N—C2  | 1.562 (19) |
| Mn—Cl4 | 2.5620 (7) | N—C2  | 1.562 (19) |
| Mn—Cl5 | 2.5620 (7) |       |            |

Symmetry codes: (i)  $x-y, x-1, -z+1$ ; (ii)  $-x+y+2, -x+1, z$ ; (iii)  $-x+2, -y, -z+1$ ; (iv)  $y+1, -x+y+1, -z+1$ ; (v)  $-y+1, x-y-1, z$ ; (vi)  $-x+2, -y, z+1/2$ ; (vii)  $-y+1, x-y, z$ ; (viii)  $-x+y+1, -x+1, z$ ; (ix)  $x, y, -z+1/2$ .

**Table S3.** The main bond angles (°) of (TMA)MnCl<sub>3</sub>

| Atom | Atom | Atom | Angle      |
|------|------|------|------------|
| Cl   | Mn   | Cl1  | 95.922(19) |
| Cl2  | Mn   | Cl3  | 95.92(2)   |
| Cl4  | Mn   | Cl5  | 95.92(2)   |
| Cl   | Mn   | Cl2  | 84.078(19) |
| Cl   | Mn   | Cl5  | 84.08(2)   |
| Cl1  | Mn   | Cl2  | 180.0      |
| Cl1  | Mn   | Cl3  | 84.08(2)   |
| Cl   | Mn   | Cl4  | 180.0      |
| Cl4  | Mn   | Cl3  | 84.08(2)   |
| Cl1  | Mn   | Cl4  | 84.079(19) |
| Cl1  | Mn   | Cl5  | 95.92(2)   |
| Cl2  | Mn   | Cl4  | 95.921(19) |
| Cl3  | Mn   | Cl5  | 180.00(3)  |
| Cl   | Mn   | Cl3  | 95.92(2)   |
| Cl2  | Mn   | Cl5  | 84.08(2)   |

**Table S4.** Fractional atomic coordinates and isotropic or equivalent isotropic displacement parameters ( $\text{\AA}^2$ )

| Atom | x            | y            | z         | $U_{\text{iso}}^*/U_{\text{eq}}$ | Occ. |
|------|--------------|--------------|-----------|----------------------------------|------|
| Mn   | 1.0000       | 0.0000       | 0.5000    | 0.0284 (4)                       | 1    |
| Cl   | 0.84992 (11) | 0.09811 (12) | 0.7500    | 0.0357 (4)                       | 1    |
| N    | 0.6667       | 0.3333       | 0.2500    | 0.0318 (11)                      | 1    |
| C1   | 0.6226 (12)  | 0.1589 (9)   | 0.2500    | 0.150 (5)                        | 1    |
| H1A  | 0.5020       | 0.0887       | 0.2500    | 0.180*                           | 1    |
| H1B  | 0.6682       | 0.1358       | 0.1294    | 0.180*                           | 0.25 |
| H1C  | 0.6682       | 0.1358       | 0.3706    | 0.180*                           | 0.25 |
| C2   | 0.6667       | 0.3333       | 0.010 (3) | 0.182 (17)                       | 0.5  |
| H2A  | 0.6944       | 0.4431       | -0.0396   | 0.219*                           | 0.5  |
| H2B  | 0.7488       | 0.3056       | -0.0396   | 0.219*                           | 0.25 |
| H2C  | 0.5569       | 0.2512       | -0.0396   | 0.219*                           | 0.25 |

**Table S5.** Hydrogen-bond geometry in the  $(\text{C}_4\text{H}_{12}\text{N})\text{MnCl}_3$  structure ( $\text{\AA}$ ,  $^\circ$ )

| D—H        | d(D—H) | d(H $\cdots$ A) | $\angle$ D—H $\cdots$ A | D $\cdots$ A | A  | Transformation for A atom |
|------------|--------|-----------------|-------------------------|--------------|----|---------------------------|
| C(1)—H(1A) | 0.96   | 2.79            | 177                     | 3.749(11)    | Cl | 1-x,-y,-1/2+z             |
| C(2)—H(2A) | 0.96   | 2.84            | 177                     | 3.7283(2)    | Cl | 1-y, x-y, -1+z            |

**Table S6.** PL lifetimes of the (TMA)MnCl<sub>3</sub> SCs under different temperatures

| Temperatures (K) | Lifetimes (ms) |
|------------------|----------------|
| 80               | 0.901          |
| 100              | 0.884          |
| 120              | 0.868          |
| 140              | 0.845          |
| 160              | 0.825          |
| 180              | 0.795          |
| 200              | 0.764          |
| 220              | 0.736          |
| 240              | 0.707          |
| 260              | 0.678          |
| 280              | 0.652          |
| 300              | 0.623          |

**Table S7.** CIE 1931 color coordinates of fabricated white LED device under various operating currents.

| Operating currents (mA) | CIE            |
|-------------------------|----------------|
| 20                      | (0.382, 0.382) |
| 40                      | (0.381, 0.383) |
| 60                      | (0.381, 0.383) |
| 80                      | (0.380, 0.384) |
| 100                     | (0.379, 0.384) |
| 120                     | (0.378, 0.384) |
| 160                     | (0.378, 0.384) |
| 200                     | (0.377, 0.385) |
| 240                     | (0.375, 0.385) |
| 280                     | (0.375, 0.385) |
